# Supplementary material for: Differential Expression of Proteins in an Atypical Presentation of Autoimmune Lymphoproliferative Syndrome
Source: MDPI journal article supplement (doi:10.3390/ijms23105366), 2022-05-11
Supplement: s1 [file s1]

**Supplementary Table S2.** Exclusively expressed proteins in control and ALPS condition. Proteins detected with CV  $\leq 0.15$ , two peptides per protein (one unique) and ANOVA  $p \leq 0.05$ .

| CONTROL                                                       |            |          |                                                                                                                                                               |
|---------------------------------------------------------------|------------|----------|---------------------------------------------------------------------------------------------------------------------------------------------------------------|
| Protein                                                       | Accession  | Gene     | Function                                                                                                                                                      |
| Serine/threonine-protein kinase                               | Q8TDC3     | BRSK1    | Serine/threonine-protein kinase that plays a key role in polarization of neurons and centrosome duplication.                                                  |
| Calcineurin B homologous protein 2                            | O43745     | CHP2     | Regulates cell pH                                                                                                                                             |
| Hippocalcin-like protein 1                                    | P37235     | HPCAL1   | May be involved in the calcium-dependent regulation of rhodopsin phosphorylation and may be of relevance for neuronal signaling in the central nervous system |
| Coiled-coil domain-containing protein 138                     | Q96M89     | CCDC138  | Coiled-coil domain-containing protein 138                                                                                                                     |
| AMSH-like protease                                            | Q96FJ0     | STAMBPL1 | Metallopeptidase                                                                                                                                              |
| Mitochondrial ornithine transporter 2                         | Q9BXI2     | SLC25A2  |                                                                                                                                                               |
| Single-stranded DNA-binding protein, mitochondrial (Fragment) | C9K0U8     | SSBP1    | Involved in mitochondrial DNA replication.                                                                                                                    |
| Bifunctional purine biosynthesis protein PURH                 | P31939     | ATIC     |                                                                                                                                                               |
| Copine-7                                                      | Q9UBL6     | CPNE7    | Membrane trafficking                                                                                                                                          |
| Immunoglobulin heavy constant alpha 1                         | P01876     | IGHA1    |                                                                                                                                                               |
| Dedicator of cytokinesis protein 1                            | Q14185     | DOCK1    | Dedicator of cytokinesis 1; phagocytosis and cell migration                                                                                                   |
| Isoform 2 of Dihydrolipoyl dehydrogenase, mitochondrial       | P09622-2   | DLD      |                                                                                                                                                               |
| CD48 antigen                                                  | A0A087X1S7 | CD48     |                                                                                                                                                               |
| Isoform 2 of Tectonic-3                                       | Q6NUS6-2   | TCTN3    | Is involved in apoptosis regulation                                                                                                                           |
| Protein SDA1 homolog                                          | E7EW05     | SDAD1    |                                                                                                                                                               |
| PWWP domain-containing protein MUM1                           | Q2TAK8     | MUM1     |                                                                                                                                                               |
| PDZ and LIM domain protein 5                                  | Q96HC4     | PDLIM5   |                                                                                                                                                               |
| Alpha-ketoglutarate-dependent dioxygenase FTO                 | A0A1B0GTC3 | FTO      |                                                                                                                                                               |
| Transcription initiation factor TFIID subunit 13              | Q15543     | TAF13    | Transcription factor                                                                                                                                          |
| Double zinc ribbon and ankyrin repeat-containing protein 1    | A0A0A0MRE2 | DZANK1   |                                                                                                                                                               |
| Zinc finger protein 385A (Fragment)                           | H0YI55     | ZNF385A  | RNA-binding protein that affects the localization and the translation of a subset of mRNA.                                                                    |
| Potassium voltage-gated channel subfamily H member 7          | A0A087WZQ1 | KCNH7    |                                                                                                                                                               |
| Isoform 2 of PCI domain-containing protein 2                  | Q5JVF3-2   | PCID2    | Component of the TREX-2 complex (transcription and export complex 2), which regulates mRNA export from the nucleus                                            |
| cTAGE family member 9                                         | A4FU28     | CTAGE9   | Growth factor                                                                                                                                                 |

|                                                              |            |        |                                                                                                                                                 |
|--------------------------------------------------------------|------------|--------|-------------------------------------------------------------------------------------------------------------------------------------------------|
| Calcium-dependent secretion activator 2                      | A0A087X1P3 | CADPS2 |                                                                                                                                                 |
| Phosphomevalonate kinase                                     | Q15126     | PMVK   | Isoprenoid biosynthesis                                                                                                                         |
| CST complex subunit STN1                                     | Q9H668     | STN1   | Subunit of an alpha accessory factor that stimulates the activity of DNA polymerase-alpha-primase, the enzyme that initiates DNA replication    |
| Neurolysin, mitochondrial                                    | E9PCB6     | NLN    | Metallopeptidase                                                                                                                                |
| HEAT repeat-containing protein 4                             | Q86WZ0     | HEATR4 |                                                                                                                                                 |
| Isoform 2 of Enhancer of polycomb homolog 1                  | Q9H2F5-2   | EPC1   | Chromatin binding protein; linked to apoptosis, DNA repair, skeletal muscle differentiation, gene silencing, and adult T-cell leukemia/lymphoma |
| Pumilio homolog 1                                            | Q14671     | PUM1   | Translation factor; involved in translational regulation of embryogenesis, and cell development and differentiation                             |
| FYVE, RhoGEF and PH domain-containing protein 6              | F8VY01     | FGD6   |                                                                                                                                                 |
| Endothelin-converting enzyme 2                               | O60344     | ECE2   |                                                                                                                                                 |
| Isoform 2 of Electrogenic sodium bicarbonate cotransporter 4 | Q9BY07-2   | SLC4A5 |                                                                                                                                                 |
| Probable ATP-dependent RNA helicase DDX46                    | Q7L014     | DDX46  |                                                                                                                                                 |

#### ALPS

|                                                             |          |         |                                                                                                                                                                                                                                                                 |
|-------------------------------------------------------------|----------|---------|-----------------------------------------------------------------------------------------------------------------------------------------------------------------------------------------------------------------------------------------------------------------|
| Myotrophin                                                  | P58546   | MTPN    |                                                                                                                                                                                                                                                                 |
| HLA class I histocompatibility antigen, A-68 alpha chain    | P01891   | HLA-A   |                                                                                                                                                                                                                                                                 |
| Activated RNA polymerase II transcriptional coactivator p15 | P53999   | SUB1    |                                                                                                                                                                                                                                                                 |
| Serine/threonine-protein kinase SMG1                        | Q96Q15   | SMG1    | Involved in both mRNA surveillance and genotoxic stress response pathways; required for optimal p53/TP53 activation after cellular exposure to genotoxic stress                                                                                                 |
| Lysine-specific demethylase 6B                              | O15054   | KDM6B   | Transcription factor; demethylase control of chromatin organization and gene silencing                                                                                                                                                                          |
| Protein tyrosine phosphatase domain-containing protein 1    | A2A3K4   | PTPDC1  | Phosphatidylinositol-transfer protein beta isoform                                                                                                                                                                                                              |
| Phosphatidylinositol transfer protein beta isoform          | P48739   | PITPNB  |                                                                                                                                                                                                                                                                 |
| Ran-specific GTPase-activating protein (Fragment)           | C9JIC6   | RANBP1  |                                                                                                                                                                                                                                                                 |
| Heterogeneous nuclear ribonucleoprotein A1                  | P09651   | HNRNPA1 |                                                                                                                                                                                                                                                                 |
| Laminin subunit gamma-1                                     | P11047   | LAMC1   |                                                                                                                                                                                                                                                                 |
| Isoform 3 of DNA repair protein complementing XP-G cells    | P28715-3 | ERCC5   | DNA repair protein. Single-strand specific DNA endonuclease makes the 3' incision in DNA excision repair following UV-induced damage and works too in other cellular processes, including RNA polymerase II transcription, and transcription-coupled DNA repair |

|                                                        |         |        |                                                                                                             |
|--------------------------------------------------------|---------|--------|-------------------------------------------------------------------------------------------------------------|
| Patatin-like phospholipase domain-containing protein 7 | Q6ZV29  | PNPLA7 |                                                                                                             |
| A-kinase anchor protein SPHKAP                         | Q2M3C7  | SPHKAP |                                                                                                             |
| Small RNA 2'-O-methyltransferase (Fragment)            | X6RGV9; | HENMT1 |                                                                                                             |
| SLIT-ROBO Rho GTPase-activating protein 3              | O43295  | SRGAP3 | G-protein modulator                                                                                         |
| Galectin-1                                             | P09382  | LGALS1 | Cell adhesion molecule. Signaling molecule<br>Galectin that can act in the regulation of cell proliferation |

---
